# Supplementary material for: Efficacy and Safety of Ticagrelor in Comparison to Clopidogrel in Elderly Patients With ST‐Segment–Elevation Myocardial Infarctions
Source: PubMed Central journal article supplement — J Am Heart Assoc. 2019 Sep 5;8(18):e012530. doi: 10.1161/JAHA.119.012530 (PMC6818018; doi:10.1161/jaha.119.012530), 2019-09-05
Supplement: JAH3-8-e012530-s001.pdf [file JAH3-8-e012530-s001.pdf]

# **SUPPLEMENTAL MATERIAL**

**Table S1. Characteristics of matched sample (238 pairs)**

| DATABASE                       | Post Matching (Matched sample) |              |            |              |
|--------------------------------|--------------------------------|--------------|------------|--------------|
|                                | Clopidogrel                    |              | Ticagrelor |              |
|                                | n                              | %            | n          | %            |
| Female sex                     | 114                            | 47.9         | 122        | 51.3         |
| Subacute STEMI                 | 27                             | 11.3         | 32         | 13.4         |
| STEMI-associated heart failure | 36                             | 15.1         | 34         | 14.3         |
| Multivessel disease            | 169                            | 71.0         | 174        | 73.1         |
| Bare metal stent               | 117                            | 49.2         | 117        | 49.2         |
| Drug eluting stent             | 88                             | 37.0         | 91         | 38.2         |
| TIMI low flow (TIMI flow 0/1)  | 22                             | 9.2          | 21         | 8.8          |
| Gp2b3a Antagonist              | 117                            | 49.2         | 114        | 47.9         |
| Diabetes mellitus              | 58                             | 24.4         | 59         | 24.8         |
| Betablocker at discharge       | 174                            | 73.1         | 176        | 73.9         |
| ACE-I or ARB at discharge      | 182                            | 76.5         | 183        | 76.9         |
| Triple-therapy at discharge    | 34                             | 14.3         | 37         | 15.5         |
| Peak CK >2000 U/l              | 73                             | 30.7         | 68         | 28.6         |
| All                            | <b>238</b>                     | <b>100.0</b> | <b>238</b> | <b>100.0</b> |
